# Supplementary material
Source: publisher site journal article supplement (https://www.dovepress.com/article/325094)
Supplement: Supplementary file 1 [file get_supplementary_file.php]

**Cost-effectiveness of a proteomic test for preterm birth prediction**

**SUPPLEMENTAL MATERIALS**

*METHODS COMMENTS*

- Illustrations of the model decision tree (Appendix Figure A1) and Markov model (Appendix Figure A2) are included below. No half-cycle correction was used for the Markov model due to the very short length of the model states (1 week).
- Details of the progesterone and HICM cost calculations are available from the corresponding author upon request. Costs for mothers are based on a cohort with complete enrollment during pregnancy and ≥12 months enrollment after delivery. Costs from infants with partial enrollment (<12 or <30 months) after birth were included over the time period available, without further adjustment. Death events are reflected through their effect on costs and not explicitly modelled (except as part of the NMI as described below).
- Handling of missing data: For Scenario 3, costs during 13-30 months for continuously enrolled infants born at week 23 were missing and were imputed using costs of those born in week 24. No other missing data issues occurred.
- The neonatal mortality/morbidity index was adapted for a claims environment from the following article: *Hassan SS, Romero R, Vidyadhari D, et al. Vaginal progesterone reduces the rate of preterm birth in women with a sonographic short cervix: a multicenter, randomized, double-blind, placebo-controlled trial. Ultrasound in obstetrics & gynecology: the official journal of the International Society of Ultrasound in Obstetrics and Gynecology. 2011;38(1):18-31.*
  - Specifically, the article’s supplementary material (Appendix S1) defines 4 separate “Composite Perinatal Mortality/Neonatal Morbidity Outcome Scores”. We used the “0 to 4 scale with NICU” and a timeframe of birth to 30 days after birth for an assessment of morbidity and mortality events.
  - A list of ICD-10-CM codes to identify each morbidity event from claims is available from the corresponding author upon request.
  - Neonatal mortality was determined from inpatient discharge records, enrollment data, and the Death Master File of the Social Security Administration. As stillbirths were excluded, mortality estimates are conservative.
  - Validation of this claims-based implementation of the NMI is a subject for future research.
- Derivation of risk ratios: Counts of deliveries in untreated and treated groups categorized by gestational age brackets were obtained from published data on studies of vaginal progesterone, 17-α-hydroxyprogesterone caproate (17-OHPC), high intensity case management, or bundles of two or more of these modalities.1-8 Simple random-effects analysis at gestational age boundaries <32, <35 and <37 weeks across all treatment types showed significant efficacy, with no significant heterogeneity at <32 or <35 weeks. A joint analysis across all studies and gestational age brackets was conducted using a multivariate, multilevel random effects model with a heteroscedastic autoregressive structure and gestational age at delivery as a moderator. Treatment efficacy was significant and gestational age at treatment was a significant moderator with direction of effect showing improvement in efficacy at earlier gestational ages. We carried out sub-analyses of studies stratified by treatment type to obtain treatment-type-specific efficacy estimates. Notably, the estimate of the efficacy of bundled treatments3,8 was nearly identical to the summed efficacies of 17-OHPC1,4,7 and HICM2,5, providing support from seven studies for the additive efficacy of treatments in combination. Three treatment effect sizes were established for analysis:
- Lower effectiveness: the central estimate across all treatment types and studies combined, largely reflective of single-modality treatment effects.1-8
- Base case: the central estimate for studies with bundled treatments.3,8
- Higher effectiveness: the estimated effect size from a recent RCT incorporating the protein ratio test and intensive bundled treatments.8

1. Meis PJ, Klebanoff M, Thom E, et al. Prevention of recurrent preterm delivery by 17 alpha-hydroxyprogesterone caproate. *N Engl J Med.* 2003; 348(24):2379-2385.
2. Newman RB, Sullivan SA, Menard MK, et al. South Carolina Partners for Preterm Birth Prevention: a regional perinatal initiative for the reduction of premature birth in a Medicaid population. *Am J Obstet Gynecol.* 2008; 199(4):393.e391-398.
3. Manuck TA, Henry E, Gibson J, et al. Pregnancy outcomes in a recurrent preterm birth prevention clinic. *Am J Obstet Gynecol.* 2011; 204(4):320.e321-326.
4. Grobman WA, Thom EA, Spong CY, et al. 17 alpha-hydroxyprogesterone caproate to prevent prematurity in nulliparas with cervical length less than 30 mm. *Am J Obstet Gynecol.* 2012; 207(5):390.e391-398.
5. Hillemeier MM, Domino ME, Wells R, et al. Effects of maternity care coordination on pregnancy outcomes: propensity-weighted analyses. *Matern Child Health J*. 2015; 19:121-127.
6. Romero R, Conde-Agudelo A, Da Fonseca E, et al. Vaginal progesterone for preventing preterm birth and adverse perinatal outcomes in singleton gestations with a short cervix: a meta-analysis of individual patient data. *Am J Obstet Gynecol.* 2018; 218(2):161-180.
7. Blackwell SC, Gyamfi-Bannerman C, Biggio JR, Jr., et al. 17-OHPC to prevent recurrent preterm birth in singleton gestations (PROLONG Study): a multicenter, international, randomized double-blind trial. *Am J Perinatol.* 2020; 37(2):127-136.
8. Branch DW, Esplin MS, Porter F, et al. Prediction and prevention of preterm birth: a prospective, randomized intervention trial. *Society for Reproductive Investigation.* 2020; abstract LBA-003.

- Derivation of transition probabilities: The Markov model has 19 states, each corresponding to a week of pregnancy (from week 19 to week 37+). Pregnant women enter the model at week 19 and either gave birth that week (PTB) or advanced to the next week of pregnancy (ultimately resulting in full-term birth if the “week 37+” state was reached).
  - For usual care, the probability of having a PTB in a specific week was calculated as the number of PTBs observed in the HIRD study population that week, divided by the population at risk that week. The transition probabilities between Markov states were calculate as 1.0 minus the probability of a PTB.
  - For the risk-screening-and-treat strategy, the risks of PTB were modified by treatment effects (the risk ratios; see prior section for details on their derivation). Using the number of PTBs modified by these treatment effects, we calculated the transition probabilities given preterm status.
  - The following table contains the numerical details for the base case. For example, starting with a population of 62,093 pregnant women, 4 of them had a PTB at week 22 of gestational age.
    - The PTB rate at week 22 for usual care was 4/62,093, and the transition probability from week 22 to week 23 was (1 minus 4/62,093).
    - In the risk-screening-and-treat arm, the number of PTBs was adjusted by the treatment effects and 4 and 2 PTBs occurred in weeks 22 and 23, respectively. The PTB rate and transition probabilities in this arm were calculated similarly, but using the full preterm population (N=4,360) as the denominator: PTB rate at week 22 was 4/4,360 and transition probability to week 23 was (1 minus 4/4,360).

| **Gestational age at birth** | **Number of pregnancies observed in the HIRD study population** | **Number of births observed in the HIRD study population** | **Usual care -Transition probabilities** | **Risk-screening-and-treat** | | |
| --- | --- | --- | --- | --- | --- | --- |
| Risk ratios (treatment effects) – base case | Number of births after adjusting for treatment effects | Transition probabilities with treatment effects among preterm |
| Week 19 | 62,093 | 0 | 0.0000 | NA | 0 | 0.0000 |
| Week 20 | 62,093 | 0 | 0.0000 | NA | 0 | 0.0000 |
| Week 21 | 62,093 | 0 | 0.0000 | NA | 0 | 0.0000 |
| Week 22 | 62,093 | 4 | 0.0001 | NA | 4 | 0.0009 |
| Week 23 | 62,089 | 12 | 0.0002 | 0.1315 | 2 | 0.0004 |
| Week 24 | 62,077 | 26 | 0.0004 | 0.1492 | 4 | 0.0009 |
| Week 25 | 62,051 | 29 | 0.0005 | 0.1693 | 5 | 0.0011 |
| Week 26 | 62,022 | 32 | 0.0005 | 0.1921 | 6 | 0.0014 |
| Week 27 | 61,990 | 63 | 0.0010 | 0.2179 | 14 | 0.0032 |
| Week 28 | 61,927 | 65 | 0.0010 | 0.2473 | 16 | 0.0037 |
| Week 29 | 61,862 | 75 | 0.0012 | 0.2806 | 21 | 0.0049 |
| Week 30 | 61,787 | 104 | 0.0017 | 0.3183 | 33 | 0.0077 |
| Week 31 | 61,683 | 115 | 0.0019 | 0.3612 | 42 | 0.0098 |
| Week 32 | 61,568 | 200 | 0.0032 | 0.4098 | 82 | 0.0194 |
| Week 33 | 61,368 | 299 | 0.0049 | 0.4649 | 139 | 0.0336 |
| Week 34 | 61,069 | 674 | 0.0110 | 0.5275 | 356 | 0.0890 |
| Week 35 | 60,395 | 820 | 0.0136 | 0.5985 | 491 | 0.1349 |
| Week 36 | 59,575 | 1,842 | 0.0309 | 0.6791 | 1,251 | 0.3975 |
| Week 37+ | 57,733 | 57,733 | 1.0000 | NA | 59,629 | N/A |

- Identification of gestational age at birth via ICD-10-CM codes:

|  | **Mother claims** | **Neonate claims** |
| --- | --- | --- |
| Weeks of gestation |  |  |
| <23 | Z3A.17, Z3A.18, Z3A.19, Z3A.20, Z3A.21, Z3A.22 | P07.21 |
| 23 | Z3A.23 | P07.22 |
| 24 | Z3A.24 | P07.23 |
| 25 | Z3A.25 | P07.24 |
| 26 | Z3A.26 | P07.25 |
| 27 | Z3A.27 | P07.26, P07.20 |
| 28 | Z3A.28 | P07.31 |
| 29 | Z3A.29 | P07.32 |
| 30 | Z3A.30 | P07.33 |
| 31 | Z3A.31 | P07.34 |
| 32 | Z3A.32 | P07.35 |
| 33 | Z3A.33 | P07.36 |
| 34 | Z3A.34 | P07.37 |
| 35 | Z3A.35 | P07.38 |
| 36 | Z3A.36 | P07.39, P07.30 |
| ≥37 | Z3A.37, Z3A.38, Z3A.39, Z3A.40, Z3A.41, Z3A.42, Z3A.49 | P08.21, P08.22 |

*SUPPLEMENTARY TABLES*

**Table A1.** Patient Selection

| **Steps** | **Identification criteria for mothers** | **Counts** |
| --- | --- | --- |
| **1** | ≥1 claim for delivery in an inpatient setting. Index Date = admission date of the delivery hospitalization | 96,222 |
| **2** | ≥1 claim for gestational age during gestational age identification perioda | 94,004 |
| **3** | Age ≥18 years old as of the estimated pregnancy start dateb | 93,253 |
| **4** | Continuously enrolled in the health plan with medical and pharmacy benefit during the baseline period (i.e. during pregnancy) | 70,047 |
| **5** | No evidence for multiple gestation during intake period | 68,306 |
| **6** | No progesterone therapy >12 to <21 weeks of gestation | 67,286 |
| **7** | No fetal chromosomal abnormality or structural anomaly associated with shortened gestation during the intake period | 63,406 |
| **8** | No preterm labor or rupture of membranes <21 weeks gestation | 63,237 |
| **9** | Continuously enrolled in the health plan with medical and pharmacy benefit during the 12 months post-index period | 42,233 |
| **10** | No claim for still births or abortion during the intake period | 40,649 |

aGestational age identification period: index date (delivery date) minus 7 days through index date plus 7 days, using ICD-10-CM code descriptions of gestational age.

bEstimated claims-based pregnancy start date: index date minus weeks of gestation identified during gestational week identification period.

| **Steps** | **Identification criteria for infants** | **Counts** |
| --- | --- | --- |
| **1** | Among those with medical and pharmacy health plan eligibility, birth year was 2016 | 101,435 |
| **2** | ≥1 medical claim with gestational age or ≥1 medical claim indicative of single live born infant within 30 days of birth date. Index Date is Birth Date | 63,945 |
| **3** | No code for multiple gestation | 62,093 |
| **4a** | *Only applied for derivation of costs in Scenario 5:* Continuously enrolled in the health plan with medical and pharmacy benefit during the 12 months post-index period | 40,116 |
| **4b** | *Only applied for derivation of costs in Scenario 3:* Continuously enrolled in the health plan with medical and pharmacy benefit during the 30 months post-index period | 22,212 |

**Table A2.** Model assumptions on preterm births and risk-screening-and-treat effectiveness

| Weeks of gestation | # of births* | % of births | Treatment effectiveness (base case)** | Treatment effectiveness (worst case)** | Treatment effectiveness (best case)** |
| --- | --- | --- | --- | --- | --- |
| <23 | 4 | 0.0% | NA | NA | NA |
| 23 | 12 | 0.0% | 0.1315 | 0.5338 | 0.0087 |
| 24 | 26 | 0.0% | 0.1492 | 0.5521 | 0.0127 |
| 25 | 29 | 0.0% | 0.1693 | 0.5711 | 0.1820 |
| 26 | 32 | 0.1% | 0.1921 | 0.5907 | 0.0258 |
| 27 | 63 | 0.1% | 0.2179 | 0.6109 | 0.0360 |
| 28 | 65 | 0.1% | 0.2473 | 0.6319 | 0.0497 |
| 29 | 75 | 0.1% | 0.2806 | 0.6536 | 0.0679 |
| 30 | 104 | 0.2% | 0.3183 | 0.6760 | 0.0971 |
| 31 | 115 | 0.2% | 0.3612 | 0.6993 | 0.1227 |
| 32 | 200 | 0.3% | 0.4098 | 0.7233 | 0.1626 |
| 33 | 299 | 0.5% | 0.4649 | 0.7481 | 0.2136 |
| 34 | 674 | 1.1% | 0.5275 | 0.7738 | 0.2783 |
| 35 | 820 | 1.3% | 0.5985 | 0.8003 | 0.3599 |
| 36 | 1,842 | 3.0% | 0.6791 | 0.8278 | 0.4620 |
| ≥37 | 57,733 | 93.0% | NA | NA | NA |
| TOTAL | **62,093** | **100.0%** | **-** | **-** | **-** |
| *Total preterm* | *4,360* | *7.0%* | **-** | **-** | **-** |

*Based on observed frequencies in the HIRD, 01 Jan 2016 to 31 Dec 2016

**Numbers represent risk ratios. For example, in the base case, the risk of a preterm birth at week 23 with the treatment is 0.1315 (87% lower) compared to without the treatment.

**Table A3.** Model assumptions on maternal and infant costs

| Weeks of gestation | Maternal care costs ($) (total, conception to 12m post-birth) | | | Infant care costs ($) (birth to 12m post-birth) | | | Infant care costs ($) (13m to 30m post-birth) | | |
| --- | --- | --- | --- | --- | --- | --- | --- | --- | --- |
|  | *Base case* | *Lower limit* | *Upper limit* | *Base case* | *Lower limit* | *Upper limit* | *Base case* | *Lower limit* | *Upper limit* |
| 23 | 54,806 | 14,296 | 95,315 | 274,114 | 22,267 | 525,962 | 52,410 | 0 | 167,764 |
| 24 | 40,559 | 21,965 | 59,152 | 671,371 | 440,732 | 902,011 | 17,753 | 4,882 | 30,624 |
| 25 | 44,678 | 31,509 | 57,848 | 381,852 | 275,578 | 488,126 | 4,934 | 414 | 9,454 |
| 26 | 52,187 | 21,186 | 83,188 | 645,687 | 473,004 | 818,371 | 25,789 | 9,966 | 41,612 |
| 27 | 55,267 | 36,539 | 73,996 | 447,108 | 300,441 | 593,776 | 10,676 | 0 | 24,853 |
| 28 | 42,709 | 30,756 | 54,662 | 289,745 | 222,120 | 357,369 | 7,541 | 522 | 14,561 |
| 29 | 53,862 | 34,939 | 72,785 | 299,118 | 233,177 | 365,058 | 4,850 | 2,368 | 7,333 |
| 30 | 45,541 | 31,379 | 59,703 | 251,890 | 207,870 | 295,910 | 5,606 | 3,221 | 7,991 |
| 31 | 52,311 | 35,574 | 69,048 | 228,934 | 169,931 | 287,937 | 15,638 | 2,817 | 28,460 |
| 32 | 37,734 | 32,002 | 43,465 | 127,758 | 108,944 | 146,572 | 4,740 | 3,008 | 6,471 |
| 33 | 42,750 | 35,890 | 49,610 | 105,837 | 85,942 | 125,732 | 3,881 | 1,259 | 6,503 |
| 34 | 38,061 | 33,249 | 42,873 | 76,584 | 65,832 | 87,335 | 3,603 | 2,816 | 4,390 |
| 35 | 33,842 | 30,737 | 36,946 | 43,289 | 36,244 | 50,333 | 3,978 | 2,939 | 5,018 |
| 36 | 31,744 | 29,580 | 33,908 | 37,123 | 30,441 | 43,805 | 3,831 | 3,072 | 4,590 |
| 37+ | 24,143 | 23,960 | 24,327 | 8,642 | 8,348 | 8,936 | 2,642 | 2,510 | 2,775 |

All values are reported in 2018 USD. Costs were sourced from the HIRD. Maternal care costs were derived from a cohort with complete enrollment during pregnancy and ≥12 months enrollment after delivery. Infant care costs were derived from a cohort with no minimum required enrollment and without further adjustment. Lower and upper limits refer to 95% confidence intervals. For PSA, all costs were modelled via gamma distributions.

**Table A4.** Model assumptions on infant costs for Scenario 3 (costs of continuously enrolled infants only)

| Weeks of gestation | Infant care costs ($) (birth to 12m post-birth)  N=40,116 | Infant care costs ($) (13m to 30m post-birth)  N=22,212 |
| --- | --- | --- |
| 23 | 632,808 | 49,948 |
| 24 | 875,166 | 49,948 |
| 25 | 546,558 | 17,802 |
| 26 | 648,327 | 56,047 |
| 27 | 549,492 | 44,765 |
| 28 | 396,711 | 12,177 |
| 29 | 319,118 | 11,959 |
| 30 | 257,987 | 12,044 |
| 31 | 292,950 | 26,853 |
| 32 | 141,001 | 7,787 |
| 33 | 119,681 | 10,729 |
| 34 | 86,980 | 6,369 |
| 35 | 45,484 | 8,021 |
| 36 | 39,276 | 7,958 |
| 37+ | 9,568 | 4,933 |

All values are reported in 2018 USD. Costs were sourced from the HIRD.

*SUPPLEMENTARY FIGURES*

**Figure A1.** Decision tree for the preterm birth model

**
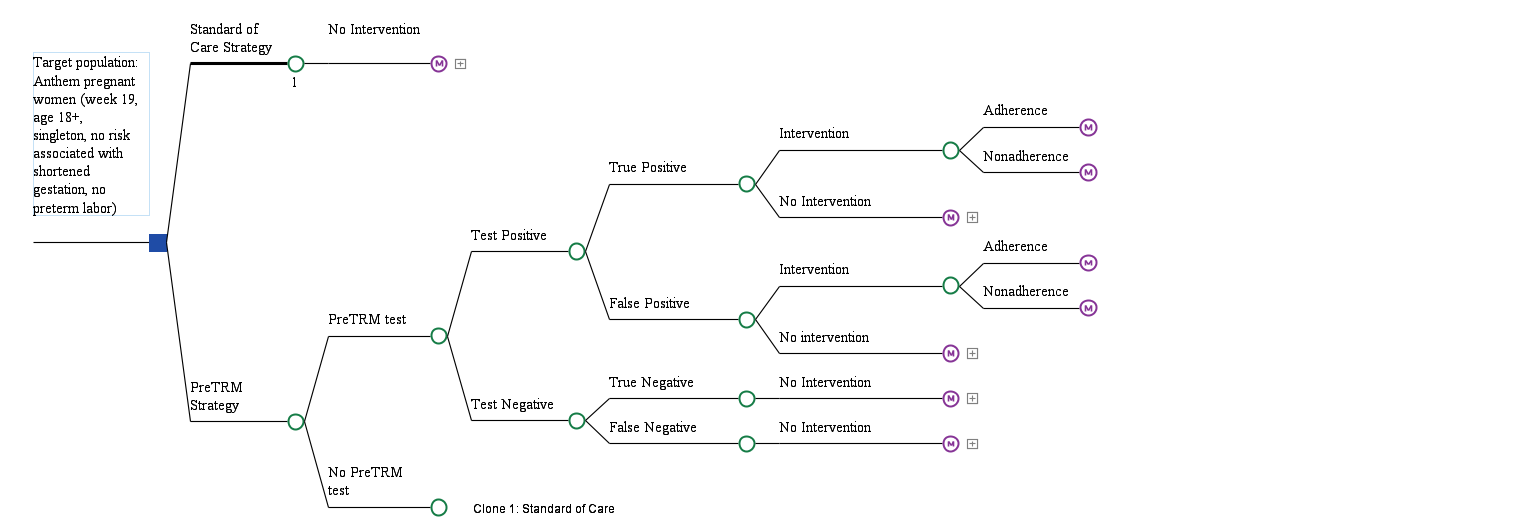
**

**Figure A2.** Markov states and transitions for the preterm birth model


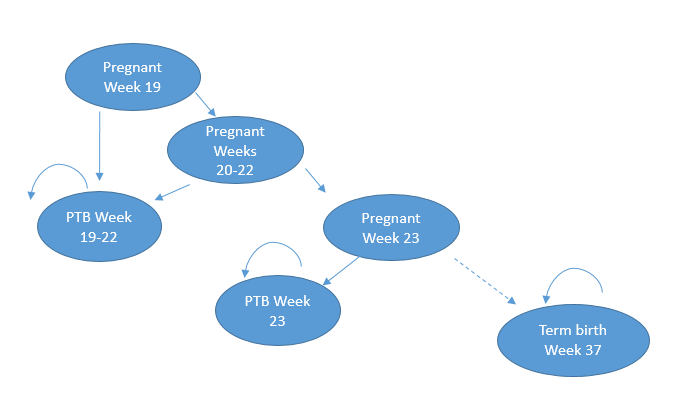


**Figure A3.** Number of births and change in the risk-screening-and-treat arm vs. usual care, base case


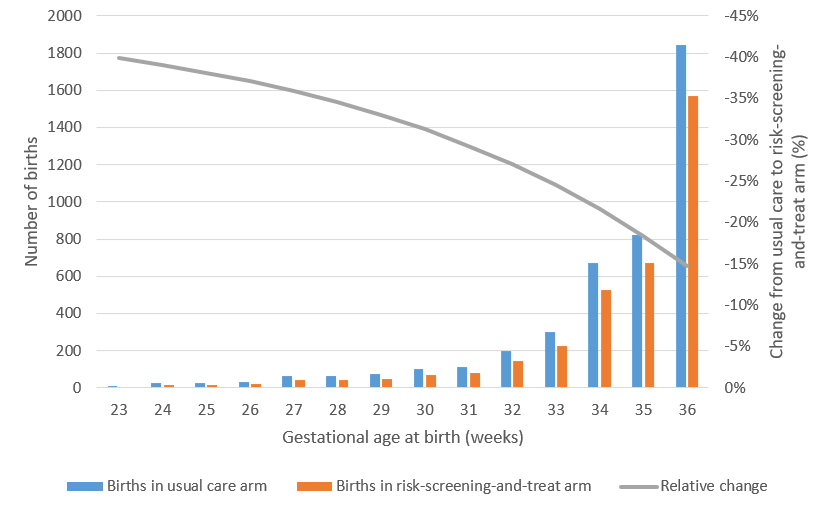


**Figure A4. Univariate sensitivity analysis (tornado diagram), births <32 weeks as endpoint**


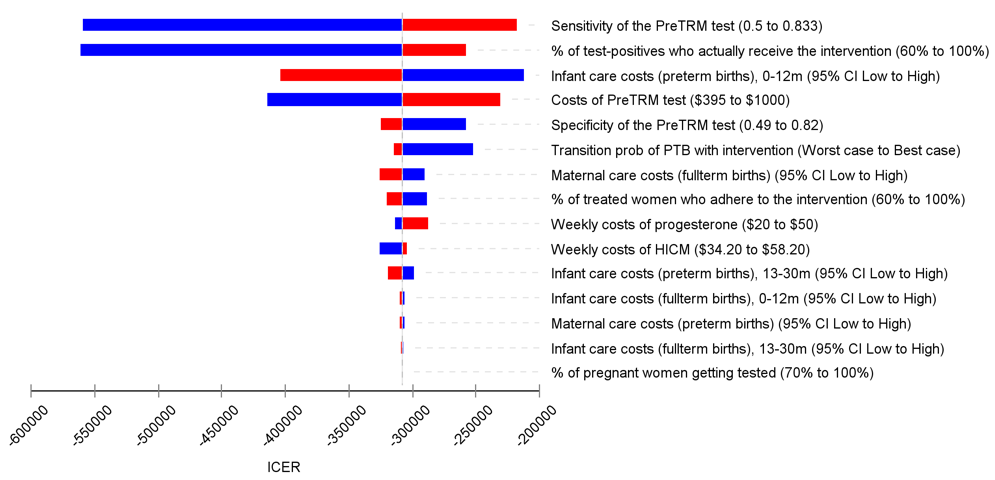


PTB = preterm birth; ICER = incremental cost-effectiveness ratio; HICM = high-intensity case management

**Figure A5. Univariate sensitivity analysis (tornado diagram), births <35 weeks as endpoint**


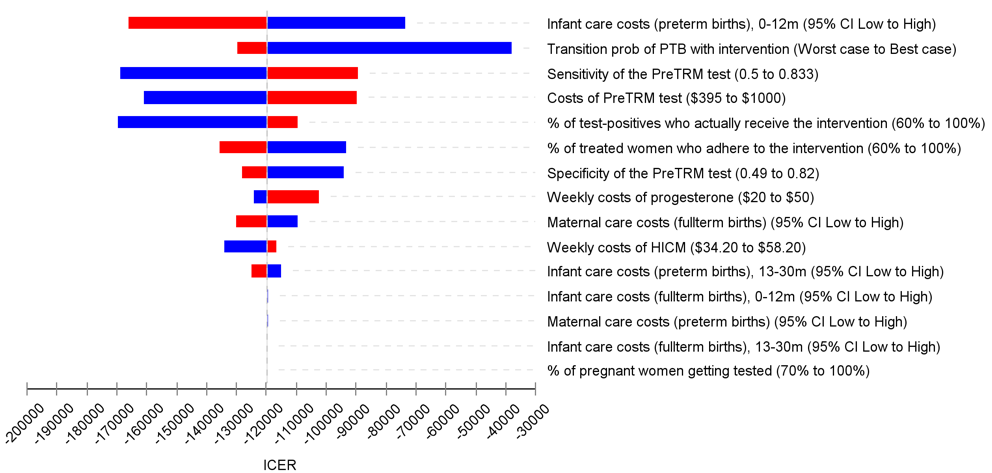


PTB = preterm birth; ICER = incremental cost-effectiveness ratio; HICM = high-intensity case management

**Figure A6.** ICER scatter plot and cost-effectiveness acceptability curves, worst-case effectiveness scenario


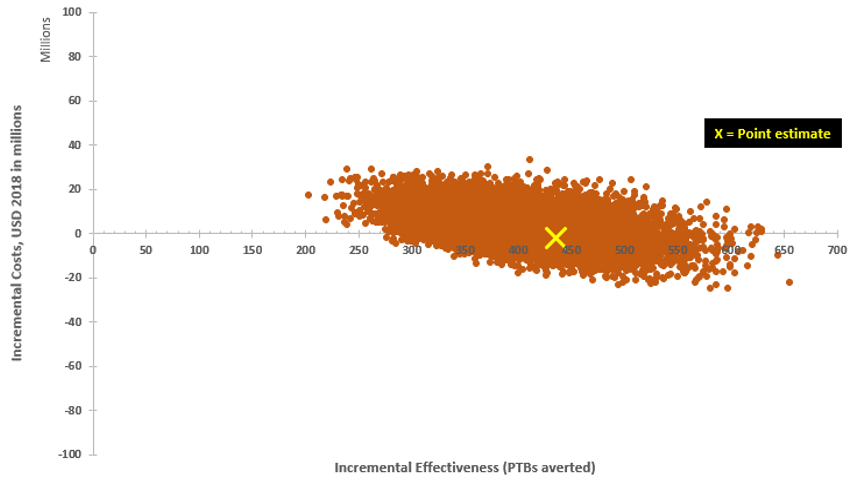


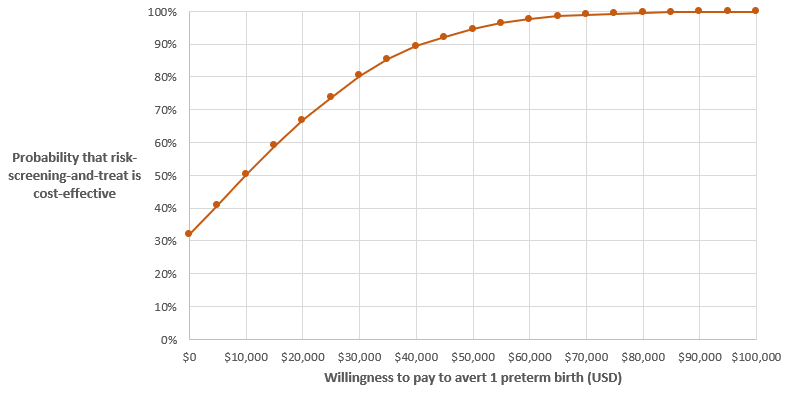


PTB = preterm birth; ICER = incremental cost-effectiveness ratio; USD = US dollars
